# Supplementary material
Source: Research Square preprint supplement (doi:10.21203/rs.3.rs-9161462/v1)
Supplement: Supplementary file 1 [file 8f5da11a244279bc665d5d8c.doc]

**Tables**

**Table 1** Sample size (n), infected region, and biometric measurements of examined fishes. Average length (AL ± standard deviation), average breadth (AB ± standard deviation), n: number of individuals examined

| **No.** | **Fish species** | **Infected region** | **AL ±SD** | **AB ± SD** | **Weight (g)** | **n** |
| --- | --- | --- | --- | --- | --- | --- |
| 1 | *Cyprinus rubrofuscus* | Gills, fins, scales | 9.6±3.39 | 2.52±1.14 | 17.59±13.78 | 21 |
| 2 | *Poecilia sphenops* | Fins and body | 4.09 ±0.74 | 1.23±0.27 | 0.68±0.30 | 8 |
| 3 | *Carassius auratus* | Gills, caudal fin, eye, belly, scales | 7.13±2.93 | 2.01±0.84 | 8.27±10.25 | 27 |
| 4 | *Cyprinus carpio* | Gills, skin, fin | 7.91±4.21 | 1.87±1.18 | 17.78±27.55 | 27 |
| 5 | *Pterophyllum scalare* | - | 9.5±2.12 | 5.25±0.78 | 25.39 ±16.19 | 2 |
| 6 | *Siluriformes* | - | 9 | 3.1 | 5.75 | 1 |
| 7 | *Pangasius* | - | 11.2 | 2.1 | 11.11 | 1 |
| 8 | *Amatitlania nigrofasciata* | - | 3.7 | 1.3 | 0.4 | 1 |
| 9 | *Gymnocormybus ternetzi* | - | 4.78±1.32 | 1.6±0.54 | 2.66±2.27 | 6 |
| 10 | *Danio rerio* | - | 4.1 | 1.1 | 0.55 | 1 |
| 11 | *Helostoma temminckii* | Pelvic fin, dorsal and anal fin | 14.5 | 5.5 | 24.11 | 1 |
| 12 | *Metriaclima estherae* | Fins and gills | 11.2 | 3.8 | 11.11 | 1 |
| 13 | *Pygocentrus nattereri* | - | 6.2 | 3.7 | 1.885 | 1 |
| 14 | *Poecilia reticulata* | - | 3.7±0.28 | 0.95±0.21 | 0.53±0.13 | 2 |
| 15 | *Xiphophorus maculatus* | - | 4.95±0.07 | 1.55±0.07 | 2.51±0.08 | 2 |
| 16 | *Xiphophorus helleri* | - | 7.3 | 1.3 | 3.08 | 1 |
| 17 | *Betta splendens* | - | 3 | 0.5 | 0.21 | 1 |
| 18 | *Oreochromis niloticus* | - | 16.25±0.35 | 6.45±0.21 | 64.16±4.21 | 2 |

**Table 2** Overall nature of ectoparasitic infection in freshwater ornamental fishes

| Number of fish examined | 106 |
| --- | --- |
| Number of infected fish | 21 |
| Number of parasites collected | 110 |
| Prevalence of infection (%) | 19.81 |
| Overall mean intensity | 5.24 |
| Index of infection | 21.79 |
| Mean abundance | 1.04 |

**Table 3** The species-wise occurrence of parasites, infected locations and parasite-specific prevalence of each parasite

| **Parasite** | **Host fish species** | **Location of infection** | **Parasite-specific prevalence (%)** |
| --- | --- | --- | --- |
| *Argulus* sp. | *Cyprinus rubrofuscus* | Mouth, fin, and body | 61.90 |
| *Carassius auratus* | Mouth, fin, and body |
| *Cyprinus* *carpio* | Mouth, fin, and body |
| *Helostoma temminckii* | Fin and body |
| *Lernaea* sp. | *Cyprinus rubrofuscus* | Fin, gills and body | 33.33 |
| *Poecilia sphenops* | Caudal Fin |
| *Carassius auratus* | Fin, gills and body |
| *Cyprinus carpio* | Fin, gills and body |
| *Dugesia* sp. | *Metriaclima estherae* | Fin, gills and body | 4.76 |
| *Piscicola* sp. | *Cyprinus carpio* | Pectoral fin and gills | 4.76 |
| *Ergasilus* sp. | *Carassius auratus* | Gills | 4.76 |
